# Supplementary material for: Metabolomics analysis reveals Embden Meyerhof Parnas pathway activation and flavonoids accumulation during dormancy transition in tree peony
Source: PubMed Central journal article supplement (PMC7583197; doi:10.1186/s12870-020-02692-x), 2020-10-23

a

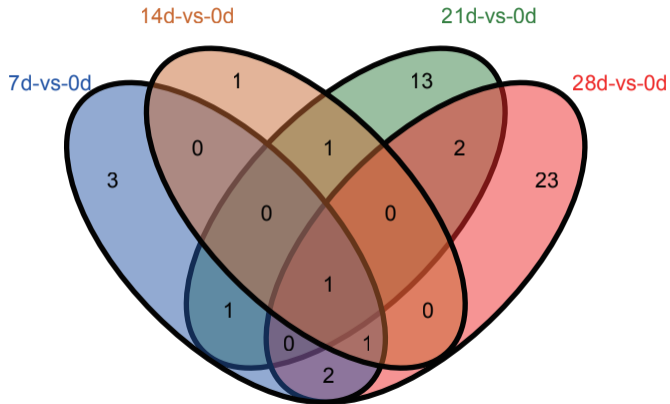

b

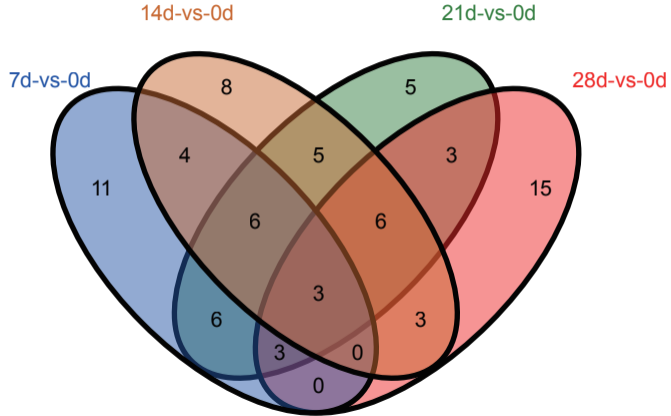

Supplement: 12870_2020_2692_MOESM7_ESM.pdf [file 12870_2020_2692_MOESM7_ESM.pdf]
