# Supplementary material for: Metabolomics analysis reveals Embden Meyerhof Parnas pathway activation and flavonoids accumulation during dormancy transition in tree peony
Source: PubMed Central journal article supplement (PMC7583197; doi:10.1186/s12870-020-02692-x), 2020-10-23
Supplement: 12870_2020_2692_MOESM8_ESM.pdf [file 12870_2020_2692_MOESM8_ESM.pdf]

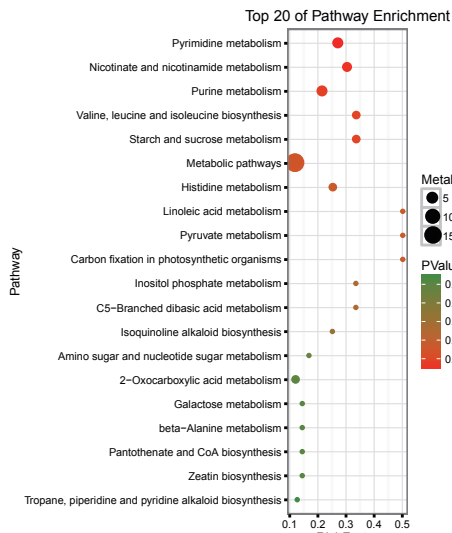

7d vs 0d

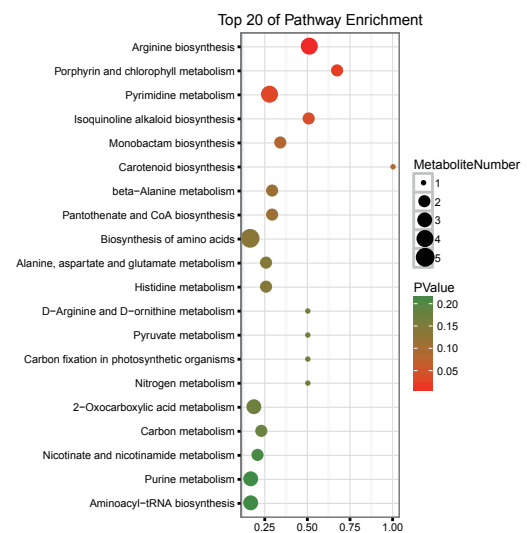

14d vs 0d

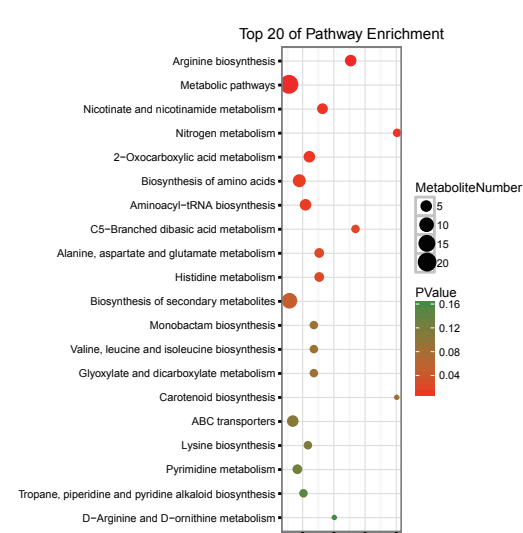

21d vs 0d

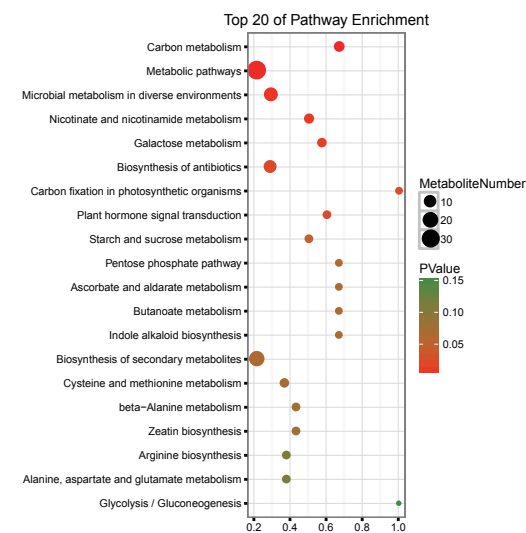

28d vs 0d

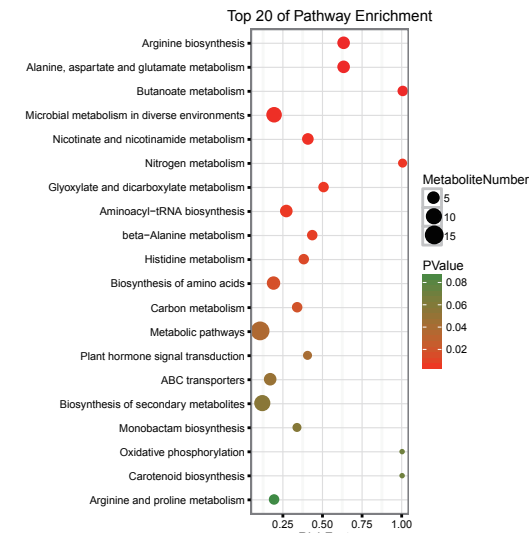

14d vs 7d

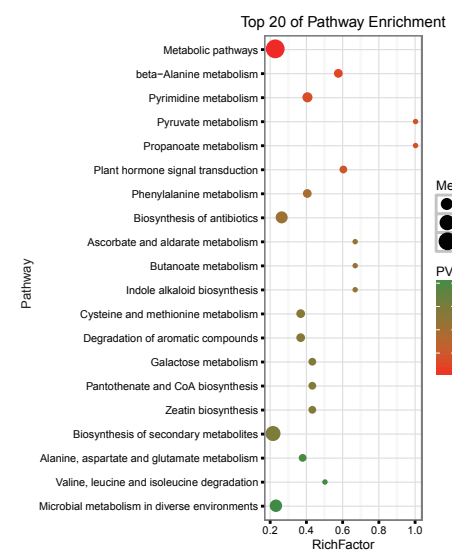

21d vs 7d

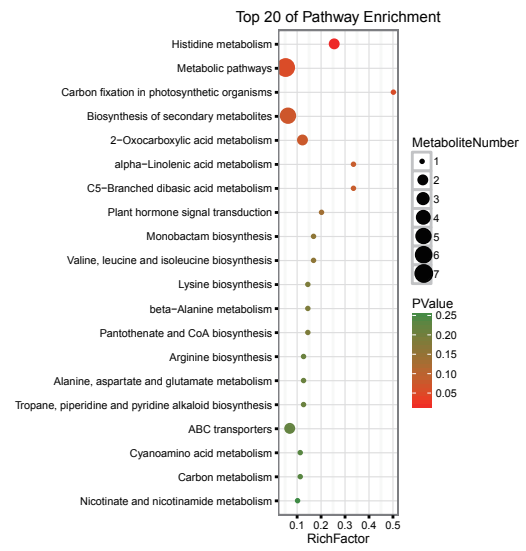

28d vs 7d

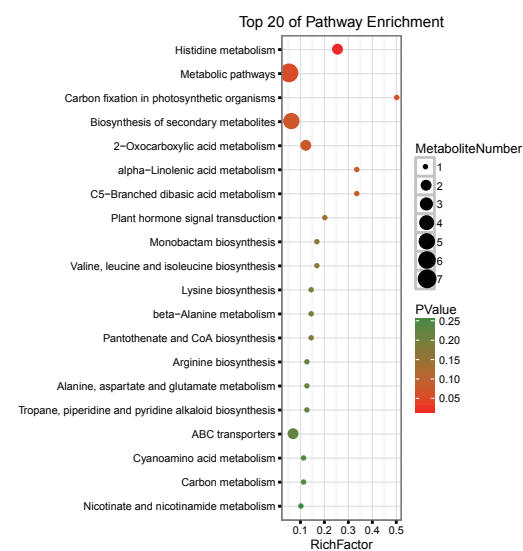

21d vs 14d

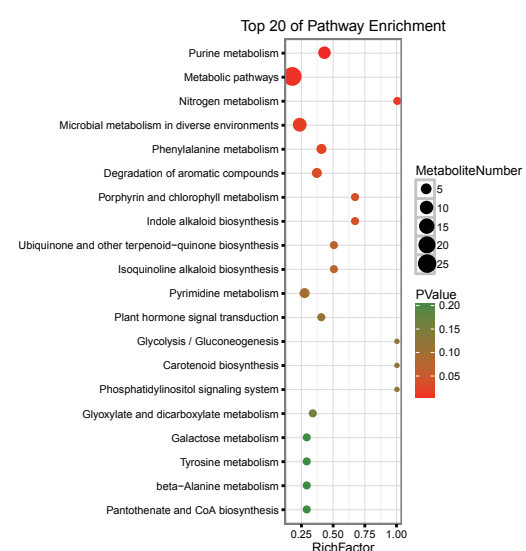

28d vs 14d

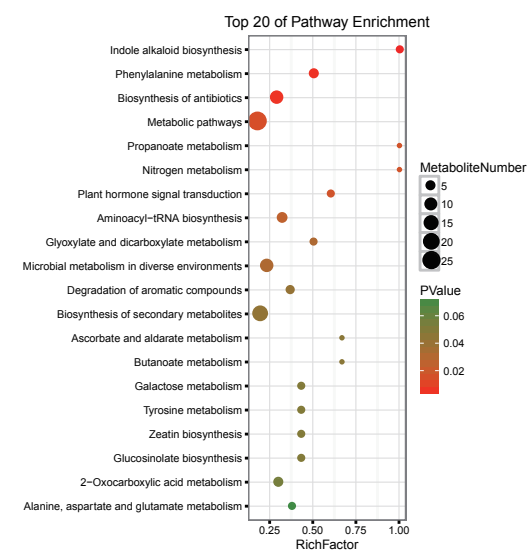

28d vs 21d
